# Supplementary material for: Prevalence, antibiotic susceptibility and associated risk factors for Extended Spectrum Beta-lactamase producing Enterobacteriaceae among patients suspected with urinary tract infection
Source: Research Square preprint supplement (doi:10.21203/rs.3.rs-8484291/v1), 2026-01-23
Supplement: Supplementary file 1 [file d06a8a66ad432c733aabe31e.pdf]

# ESBL Tool

|                                                                                                                                                                                                                           |   |
|---------------------------------------------------------------------------------------------------------------------------------------------------------------------------------------------------------------------------|---|
| Date                                                                                                                                                                                                                      | * |
| <div></div>                                                                                                                                                                                                               |   |
| ID No.                                                                                                                                                                                                                    | * |
| <div></div>                                                                                                                                                                                                               |   |
| Age                                                                                                                                                                                                                       | * |
| <div></div>                                                                                                                                                                                                               |   |
| Sex                                                                                                                                                                                                                       | * |
| <div><div><input type="radio"/> Male</div><div><input type="radio"/> Female</div></div>                                                                                                                                   |   |
| Marital status                                                                                                                                                                                                            | * |
| <div><div><input type="radio"/> Single</div><div><input type="radio"/> Married</div><div><input type="radio"/> Widowed</div><div><input type="radio"/> Divorced</div></div>                                               |   |
| Educational level                                                                                                                                                                                                         | * |
| <div><div><input type="radio"/> No formal education</div><div><input type="radio"/> Primary school</div><div><input type="radio"/> Secondary school</div><div><input type="radio"/> College/University degree</div></div> |   |
| Occupation                                                                                                                                                                                                                | * |
| <div><div><input type="radio"/> Unemployed</div><div><input type="radio"/> Self employed</div><div><input type="radio"/> Employed</div></div>                                                                             |   |
| Residence                                                                                                                                                                                                                 | * |
| <div><div><input type="radio"/> Rural</div><div><input type="radio"/> Urban</div></div>                                                                                                                                   |   |

Water intake

\*

- ☐ No water intake in a day
- ☐ Less water intake/day
- ☐ 2.7-3.7 litres of water/day

Urine voiding

\*

- ☐ Difficulty of urination
- ☐ Delayed urination
- ☐ Infrequent urination
- ☐ Frequent urination

Is there any signs and symptoms of UTI?

\*

- ☐ Yes
- ☐ No

What are signs and symptoms presenting?

\*

Have you ever been diagnosed with urinary obstructive disease (UTI) before?

\*

- ☐ Yes
- ☐ No

Do you have history of urinary tract catheterisation?

\*

- ☐ Yes
- ☐ No

Do you have history of urinary tract surgery?

\*

- ☐ Yes
- ☐ No

Have you ever been hospitalised before?

\*

- ☐ Yes
- ☐ No

Have you ever received any antibiotic treatment before?

\*

- ☐ Yes
- ☐ No

What are those antibiotics received before?

\*

Is there any confirmed chronic disease like Diabetes mellitus, HIV, hypertension, cancer .....etc?

\*

☐ Yes

☐ No

What are the chronic disease you had been diagnosed?

\*
